# Supplementary material
Source: Elsevier journal article supplement (https://www.sciencedirect.com/science/article/pii/S1885585718304924)
Supplement: mmc1 [file mmc1.pdf]

**Search strategy:**

*Date of publication:* 01/01/2006 to present.

*Language:* Spanish/English.

1. Cardiopulmonary resuscitation/education [MeSH]
2. Cardiopulmonary resuscitation/instrumentation [MeSH]
3. Cardiopulmonary resuscitation/methods [MeSH]
4. „Cardiopulmonary resuscitation“ [Title/Abstract]
5. CPR [Title/Abstract]
6. Resuscitation [Title/Abstract]
7. “Basic Life Support” [Title/Abstract]
8. BLS [Title/Abstract]
9. AED [Title/Abstract]
10. Defibrillator\* [Title/Abstract]
11. Defibrillation [Title/Abstract]
12. 1 OR 2 OR 3 OR 4 OR 5 OR 6 OR 7 OR 8 OR 9 OR 10 OR 11
  
13. Education [MeSH]
14. Formative feedback\* [MeSH]
15. "simulation training"[MeSH Terms]
16. Train\* [Title/Abstract]
17. Educat\* [Title/Abstract]
18. Teach\* [Title/Abstract]
19. Learn\* [Title/Abstract]
20. Manikin\* [Title/Abstract]
21. 13 OR 14 OR 15 OR 16 OR 17 OR 18 OR 19 OR 20
  
22. Laypeople\* [Title/Abstract]
23. Layperson\* [Title/Abstract]
24. „Lay person\*“ [Title/Abstract]
25. Bystander\* [Title/Abstract]
26. Citizen\* [Title/Abstract]
27. Untrained [Title/Abstract]
28. Community [Title/Abstract]
29. „First Responder\*“ [Title/Abstract]
30. Caregiver\* [Title/Abstract]
31. Witness\* [Title/Abstract]
32. Family [Title/Abstract]
33. 23 OR 24 OR 25 OR 26 OR 27 OR 28 OR 29 OR 30 OR 31 OR 32
  
- 34. 12 AND 21 AND 33**
