# Supplementary material
Source: Elsevier journal article supplement (https://www.sciencedirect.com/science/article/pii/S1885585718304924)
Supplement: mmc2 [file S1885585718304924:mmc2.pdf]

**Supplementary material, Table 1.** Quality Assessment (MERSQI Scale) and Inter-rater Reliability

|                                          | MERSQI scale items |                                    | Mean score/<br>maximum score | K<br>(SE)        | CI<br><i>P</i>        | Agreement      |
|------------------------------------------|--------------------|------------------------------------|------------------------------|------------------|-----------------------|----------------|
| Study design                             | 1                  | Study design                       | 2.2/3.0                      | 1.000<br>(0.000) | 1.000-1.000<br>< .001 | Almost perfect |
| Sampling                                 | 2                  | No. of institutions<br>studied     | 0.7/1.5                      | 0.892<br>(0.132) | 0.607-1.000<br>< .001 | Almost perfect |
|                                          | 3                  | Response rate, %                   | 1.4/1.5                      | 0.534<br>(0.250) | 0.000-1.000<br>< .001 | Moderate       |
| Type of data                             | 4                  | Type of data                       | 3.0/3.0                      | 1.000<br>(0.000) | 1.000-1.000<br>< .001 | Almost perfect |
| Validity of<br>evaluation<br>instruments | 5                  | Internal structure                 | 0.4/1.0                      | 0.851<br>(0.103) | 0.624-1.000<br>< .001 | Almost perfect |
|                                          | 6                  | Content                            | 0.7/1.0                      | 0.822<br>(0.124) | 0.512-1.000<br>< .001 | Almost perfect |
|                                          | 7                  | Relationship to<br>other variables | 0.1/1.0                      | 0.362<br>(0.293) | 0.000-0.926<br>.015   | Fair           |
| Data analysis                            | 8                  | Appropriateness of<br>analysis     | 1.0/1.0                      | 1.000<br>(0.000) | 1.000-1.000<br>< .001 | Almost perfect |
|                                          | 9                  | Complexity of<br>analysis          | 1.9/2.0                      | 0.362<br>(0.277) | 0.000-0.910<br>.015   | Fair           |
| Outcomes                                 | 10                 | Outcomes                           | 1.5/3.0                      | 1.000<br>(0.000) | 1.000-1.000<br>< .001 | Almost perfect |
|                                          |                    | <b>Mean score</b>                  | 13.0/18.0                    | 0.782            |                       | Substantial    |

K, Cohen's kappa coefficient.
